# Supplementary material
Source: HighWire-hosted journal article supplement (https://oem.bmj.com/content/80/10/590)
Supplement: inline-supplementary-material-1 [file inline-supplementary-material-1.pdf]

## Supplementary Materials

**Table S1.** Search Strategy

| Databases | Selected databases                                                                                                                                                                                                                                                                                                                                             | Search date | Other parameters                                                                                                                                      | Keywords                                                                                                                                                                                                                                                                                                                                                                                                               | Search hits |
|-----------|----------------------------------------------------------------------------------------------------------------------------------------------------------------------------------------------------------------------------------------------------------------------------------------------------------------------------------------------------------------|-------------|-------------------------------------------------------------------------------------------------------------------------------------------------------|------------------------------------------------------------------------------------------------------------------------------------------------------------------------------------------------------------------------------------------------------------------------------------------------------------------------------------------------------------------------------------------------------------------------|-------------|
| ProQuest  | Australia & New Zealand Database<br>Continental Europe Database<br>Criminal Justice Database<br>East & South Asia Database<br>East Europe, Central Europe Database<br>Policy File Index<br>ProQuest Dissertations & Theses Global<br>Psychology Database<br>PTSDpubs<br>Public Health Database<br>Publicly Available Content Database<br>UK & Ireland Database | 2/3/2023    | Source types included books, conference paper & proceedings, dissertations & theses, government & official publications, reports, scholarly journals. | In title or abstract:<br>1. (police OR policing OR officer* OR law enforcement)<br>AND<br>2. (resilien* OR mindful* OR psychological OR mental OR toughness)<br>AND<br>3. (training OR education* OR intervent* OR program*)<br>AND<br>In full text/all fields:<br>4. (experiment* OR quasi* OR evaluat* OR control* OR comparison* OR random* OR nonrandom* OR non-random OR RCT OR effect* OR impact* OR intervent*) | 3,427       |
| EBSCO     | Academic Search Complete<br>Alt HealthWatch<br>APA Psych Articles<br>APA Psych Books<br>APA Psych Extra<br>APA Psych Info                                                                                                                                                                                                                                      | 1/29/2023   | Source types excluded magazines, trade publications, and news.                                                                                        |                                                                                                                                                                                                                                                                                                                                                                                                                        | 7,485       |

---

|         |                           |          |       |
|---------|---------------------------|----------|-------|
|         | Criminal Justice          |          |       |
|         | Abstracts                 |          |       |
|         | Global Health             |          |       |
|         | Health Source-            |          |       |
|         | Nursing/Academic          |          |       |
|         | Edition                   |          |       |
|         | MEDLINE                   |          |       |
|         | Mental Measurements       |          |       |
|         | Yearsbook with Tests in   |          |       |
|         | Print                     |          |       |
|         | National Criminal Justice |          |       |
|         | Reference Service         |          |       |
|         | Abstracts                 |          |       |
|         | Psychology and            |          |       |
|         | Behavioral Sciences       |          |       |
|         | Collection                |          |       |
|         | Public Administration     |          |       |
|         | Abstracts                 |          |       |
|         | Social Work Abstracts     |          |       |
|         | SocINDEX                  |          |       |
|         | Violence & Abuse          |          |       |
|         | Abstract                  |          |       |
| Web of  | Social Sciences Citation  | 2/3/2023 | 1,586 |
| Science | Index                     |          |       |
|         | Conference Proceedings    |          |       |
|         | Citation Index – Social   |          |       |
|         | Sciences and Humanities   |          |       |
|         | Book Citation Index –     |          |       |
|         | Social Sciences and       |          |       |
|         | Humanities                |          |       |

---

**Table S2. Review studies used for handsearching**

| Review studies                                                                                                                                                                                                                                                                                                                                                          | Eligible studies identified from the references                                                                                                                                                                                |
|-------------------------------------------------------------------------------------------------------------------------------------------------------------------------------------------------------------------------------------------------------------------------------------------------------------------------------------------------------------------------|--------------------------------------------------------------------------------------------------------------------------------------------------------------------------------------------------------------------------------|
| <p>1.<br/>Alshahrani KM, Johnson J, Prudenzi A, O'Connor DB. The effectiveness of psychological interventions for reducing PTSD and psychological distress in first responders: A systematic review and meta-analysis. <i>PLOS ONE</i>. 2022;17(8):e0272732. doi:<a href="https://doi.org/10.1371/journal.pone.0272732">10.1371/journal.pone.0272732</a></p>            | <p>Fitzhugh H, Michaelides G, Connolly S, Daniels K. <i>Mindfulness in Policing: A Randomized Controlled Trial of Two Online Mindfulness Resources across Five Forces in England and Wales</i>. College of Policing; 2019.</p> |
| <p>2.<br/>Brassington K, Lomas T. Can resilience training improve well-being for people in high-risk occupations? A systematic review through a multidimensional lens. <i>The Journal of Positive Psychology</i>. 2021;16(5):573-592. doi:<a href="https://doi.org/10.1080/17439760.2020.1752783">10.1080/17439760.2020.1752783</a></p>                                 |                                                                                                                                                                                                                                |
| <p>3.<br/>Claringbold G, Robinson N, Anglim J, Kavadas V, Walker A, Forsyth L. A systematic review of well-being interventions and initiatives for Australian and New Zealand emergency service workers. <i>Australian Journal of Psychology</i>. 2022;74(1):2123282. doi:<a href="https://doi.org/10.1080/00049530.2022.2123282">10.1080/00049530.2022.2123282</a></p> |                                                                                                                                                                                                                                |
| <p>4.<br/>Corthésy-Blondin L, Genest C, Dargis L, Bardon C, Mishara BL. Reducing the impacts of exposure to potentially traumatic events on the mental health of public safety personnel: A rapid systematic scoping review. <i>Psychological Services</i>. 2022;19(Suppl 2):80-94. doi:<a href="https://doi.org/10.1037/ser0000572">10.1037/ser0000572</a></p>         |                                                                                                                                                                                                                                |
| <p>5.<br/>Corthésy-Blondin L, Genest C, Dargis L, Bardon C, Mishara BL. Reducing the impacts of exposure to potentially traumatic events on the mental health of public safety personnel: A rapid systematic scoping review. <i>Psychological Services</i>. 2022;19(Suppl 2):80-94. doi:<a href="https://doi.org/10.1037/ser0000572">10.1037/ser0000572</a></p>         |                                                                                                                                                                                                                                |
| <p>6.<br/>Edgelow M, Scholefield E, McPherson M, Mehta S, Ortlieb A. A review of workplace mental health interventions and their implementation in public safety organizations. <i>Int Arch Occup Environ Health</i>. 2022;95(3):645-664. doi:<a href="https://doi.org/10.1007/s00420-021-01772-1">10.1007/s00420-021-01772-1</a></p>                                   |                                                                                                                                                                                                                                |

- 
7. Joyce S, Shand F, Tighe J, Laurent SJ, Bryant RA, Harvey SB. Road to resilience: a systematic review and meta-analysis of resilience training programmes and interventions. *BMJ Open*. 2018;8(6):e017858. doi:[10.1136/bmjopen-2017-017858](https://doi.org/10.1136/bmjopen-2017-017858)
  8. Maglione MA, Chen C, Bialas A, et al. Combat and Operational Stress Control Interventions and PTSD: A Systematic Review and Meta-Analysis. *Military Medicine*. 2022;187(7-8):e846-e855. doi:[10.1093/milmed/usab310](https://doi.org/10.1093/milmed/usab310)
  9. Robertson IT, Cooper CL, Sarkar M, Curran T. Resilience training in the workplace from 2003 to 2014: A systematic review. *Journal of Occupational and Organizational Psychology*. 2015;88(3):533-562. doi:[10.1111/joop.12120](https://doi.org/10.1111/joop.12120)
  10. Tan L, Petrie K, Deady M, Bryant RA, Harvey SB. Systematic review of first responder post-deployment or post-incident psychosocial interventions. *Occupational Medicine*. 2022;72(3):160-169. doi:[10.1093/occmed/kqab182](https://doi.org/10.1093/occmed/kqab182)
  11. Vadvilavičius T, Varnagirytė E, Jarašiūnaitė-Fedosejeva G, Gustainienė L. The Effectiveness of Mindfulness-Based Interventions for Police Officers' Stress Reduction: a Systematic Review. *J Police Crim Psych*. 2023;38(1):223-239. doi:[10.1007/s11896-022-09570-2](https://doi.org/10.1007/s11896-022-09570-2)
  12. Vanhove AJ, Herian MN, Perez ALU, Harms PD, Lester PB. Can resilience be developed at work? A meta-analytic review of resilience-building programme effectiveness. *Journal of Occupational and Organizational Psychology*. 2016;89(2):278-307. doi:[10.1111/joop.12123](https://doi.org/10.1111/joop.12123)
  13. Wild J, El-Salahi S, Esposti MD. The Effectiveness of Interventions Aimed at Improving Well-Being and Resilience to Stress in First Responders. *European Psychologist*. 2020;25(4):252-271. doi:[10.1027/1016-9040/a000402](https://doi.org/10.1027/1016-9040/a000402)
-

### Supplementary Material 3: Effect sizes calculation adjustment for quasi-experimental studies

$$d = \frac{\bar{X}_{txt-post} - \bar{X}_{ctl-post} - (\bar{X}_{txt-pre} - \bar{X}_{ctl-pre})}{\sqrt{((n_{txt}-1) s_{txt-post}^2 + (n_{ctl}-1) s_{ctl-post}^2) / (n_{txt} + n_{ctl} - 2)}}$$

in which  $\bar{X}_{txt-post}$  is the mean score for the treatment group at post-training or follow-up,  $\bar{X}_{ctl-post}$  is the mean score for the control group at post-training or follow-up,  $\bar{X}_{txt-pre}$  is the mean score for the treatment group at baseline,  $\bar{X}_{ctl-pre}$  is the mean score for the control group at baseline,  $s_{txt-post}$  is the standard deviation of post-training score for the treatment group,  $s_{ctl-post}$  is the standard deviation of post-training score for the control group,  $n_{txt}$  is the sample size of the treatment group, and  $n_{ctl}$  is the sample size of the control group. If two groups are similar in any given outcome at baseline (i.e.,  $\bar{X}_{txt-pre} - \bar{X}_{ctl-pre} \cong 0$ ), then the effect size will be approximate to SMDs calculated for RCTs.

**Table S4.** Quality assessment scores

| <b>Study</b>                  | 1 | 2 | 3 | 4 | 5 | 6 | 7 | 8 | 9 | 10 | 11 | 12 | 13 | 14 | 15 | 16 | 17 | 18 | 19 | 20 | 21 | 22 | 23 | 24 | 25 | 26 | 27 | total |    |
|-------------------------------|---|---|---|---|---|---|---|---|---|----|----|----|----|----|----|----|----|----|----|----|----|----|----|----|----|----|----|-------|----|
| Fitzhugh et al. (2019)        | 1 | 1 | 1 | 1 | 0 | 0 | 1 | 0 | 0 | 0  | 0  | 0  | 1  | 0  | 0  | 1  | 1  | 1  | 1  | 1  | 1  | 1  | 1  | 1  | 1  | 1  | 0  | 0     | 16 |
| Arnetz et al (2009)           | 1 | 1 | 0 | 1 | 0 | 1 | 1 | 0 | 1 | 1  | 0  | 0  | 1  | 0  | 0  | 1  | 1  | 1  | 1  | 1  | 1  | 1  | 1  | 0  | 0  | 1  | 0  | 17    |    |
| Chitra and Karunanidhi (2021) | 1 | 1 | 1 | 1 | 2 | 1 | 1 | 0 | 1 | 1  | 0  | 0  | 1  | 0  | 1  | 1  | 1  | 1  | 0  | 1  | 1  | 1  | 1  | 1  | 1  | 1  | 0  | 22    |    |
| Christopher et al. (2018)     | 1 | 1 | 1 | 1 | 2 | 1 | 1 | 0 | 0 | 1  | 0  | 0  | 1  | 0  | 0  | 1  | 1  | 1  | 1  | 1  | 1  | 1  | 1  | 0  | 1  | 0  | 0  | 19    |    |
| Grupe et al. (2021)           | 1 | 1 | 1 | 1 | 2 | 0 | 0 | 0 | 1 | 1  | 0  | 0  | 1  | 0  | 0  | 1  | 1  | 1  | 1  | 1  | 1  | 1  | 1  | 0  | 1  | 0  | 0  | 18    |    |
| Horan (2017a)                 | 1 | 1 | 0 | 1 | 2 | 1 | 1 | 0 | 1 | 0  | 0  | 0  | 1  | 0  | 0  | 1  | 1  | 1  | 1  | 1  | 1  | 1  | 1  | 0  | 0  | 0  | 0  | 17    |    |
| McCrafty et al. (1999)        | 1 | 1 | 0 | 1 | 1 | 1 | 1 | 0 | 1 | 0  | 0  | 0  | 1  | 0  | 0  | 1  | 1  | 1  | 1  | 1  | 1  | 1  | 1  | 0  | 0  | 0  | 0  | 16    |    |
| Rosmith(2013)                 | 1 | 1 | 0 | 1 | 0 | 1 | 1 | 0 | 1 | 1  | 0  | 0  | 1  | 0  | 0  | 1  | 1  | 1  | 1  | 1  | 1  | 1  | 1  | 0  | 0  | 1  | 0  | 17    |    |
| Trombka et al (2021)          | 1 | 1 | 1 | 1 | 2 | 1 | 1 | 0 | 0 | 0  | 0  | 0  | 1  | 0  | 1  | 1  | 1  | 1  | 1  | 1  | 1  | 1  | 1  | 1  | 1  | 1  | 0  | 1     | 21 |
| Brouzos et al. (2022)         | 1 | 1 | 0 | 1 | 2 | 1 | 1 | 0 | 1 | 0  | 0  | 0  | 1  | 0  | 0  | 1  | 1  | 1  | 1  | 1  | 1  | 1  | 0  | 0  | 0  | 1  | 0  | 17    |    |
| Romosiou et al. (2019)        | 1 | 1 | 0 | 1 | 2 | 1 | 1 | 0 | 1 | 0  | 0  | 0  | 1  | 0  | 0  | 1  | 1  | 1  | 1  | 1  | 1  | 0  | 0  | 0  | 0  | 1  | 0  | 16    |    |
| Navarrete et al. (2022)       | 1 | 1 | 1 | 1 | 2 | 1 | 1 | 0 | 0 | 1  | 0  | 0  | 1  | 0  | 0  | 1  | 1  | 1  | 1  | 1  | 1  | 1  | 0  | 0  | 0  | 0  | 0  | 17    |    |
| Meulen et al. (2019)          | 1 | 1 | 0 | 1 | 2 | 1 | 1 | 0 | 1 | 1  | 0  | 0  | 1  | 0  | 0  | 1  | 1  | 1  | 0  | 1  | 0  | 0  | 0  | 0  | 0  | 0  | 0  | 14    |    |
| Au et al. (2018)              | 1 | 1 | 0 | 1 | 0 | 1 | 1 | 0 | 1 | 0  | 0  | 0  | 1  | 0  | 0  | 1  | 0  | 1  | 1  | 1  | 1  | 1  | 0  | 0  | 0  | 1  | 0  | 14    |    |
| Horan (2017b)                 | 1 | 1 | 0 | 1 | 2 | 1 | 1 | 0 | 0 | 0  | 0  | 0  | 1  | 0  | 0  | 1  | 1  | 1  | 1  | 1  | 1  | 1  | 0  | 0  | 0  | 0  | 0  | 14    |    |

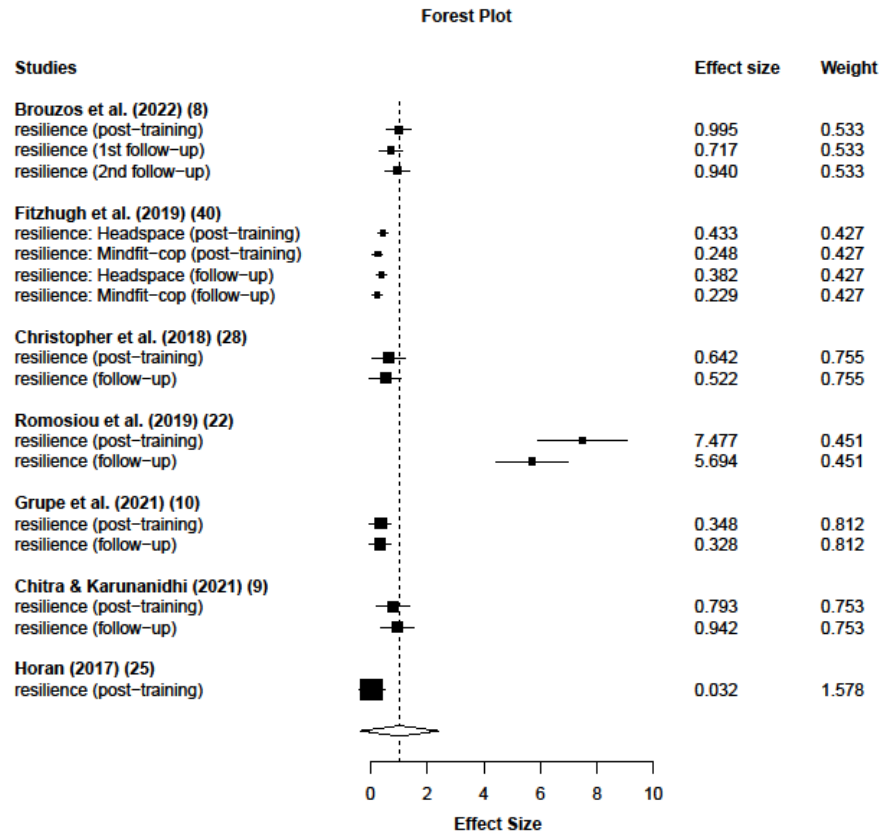

**Figure S1.** Forest plot of the effect of training programs on resilience

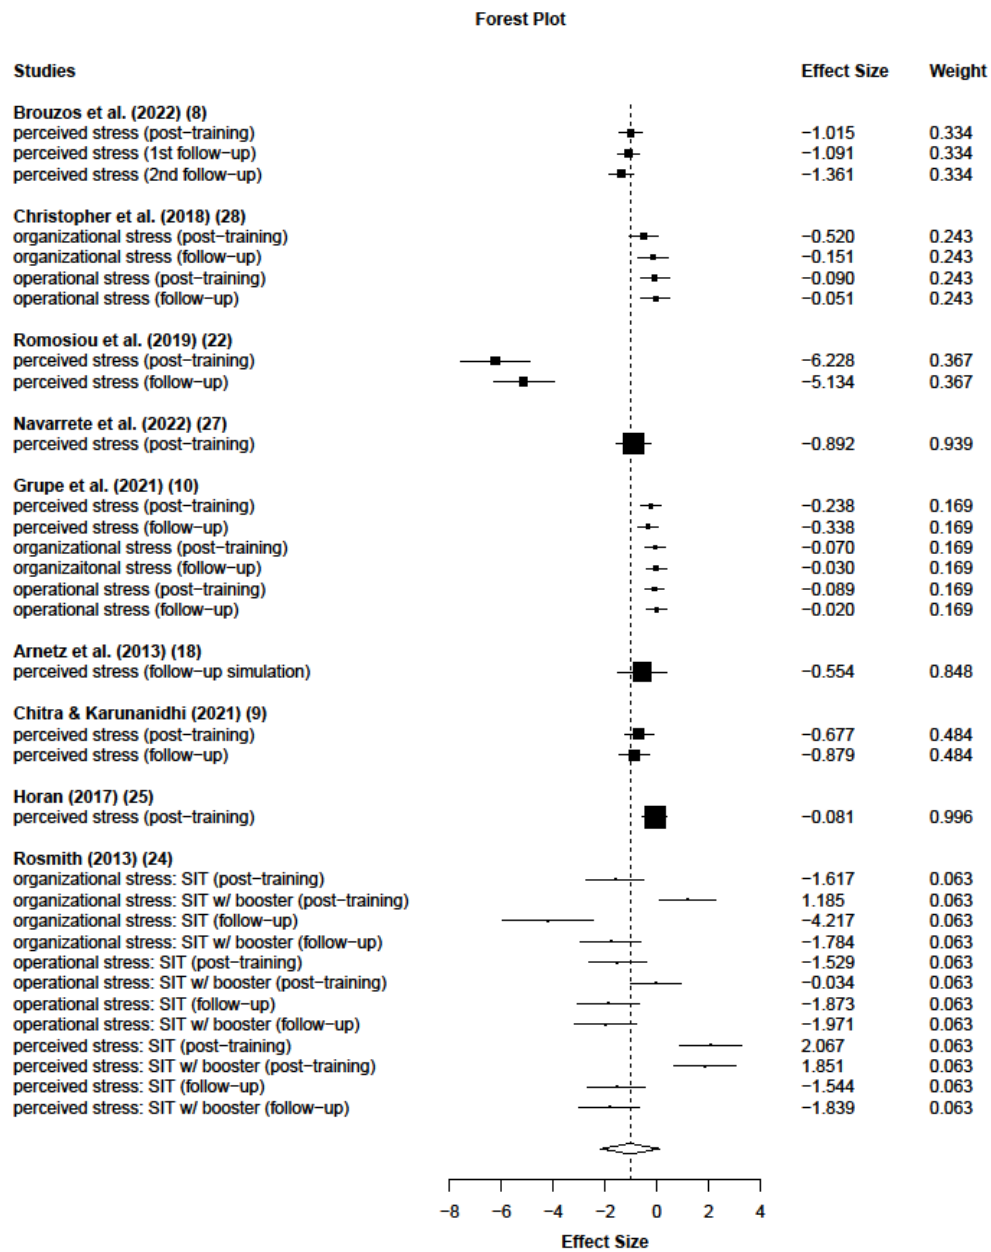

**Figure S2.** Forest plot of the effect of training programs on perceived stress



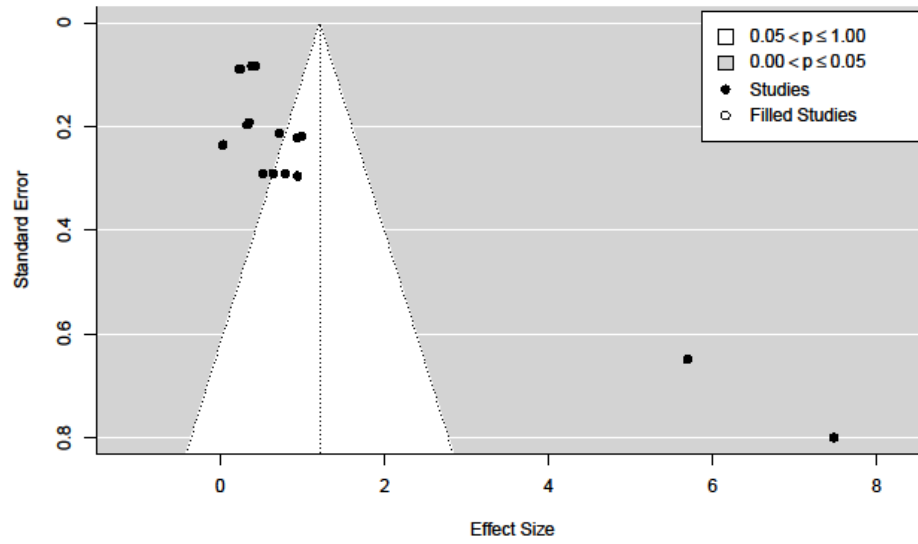

**Figure S3.** Funnel Plot of resilience

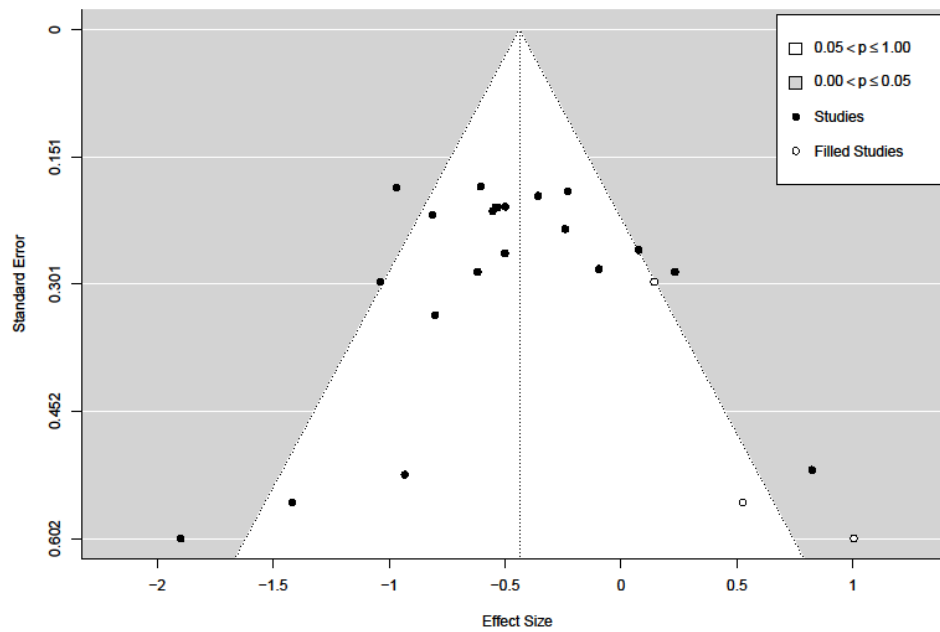

**Figure S4.** Funnel Plot of depression

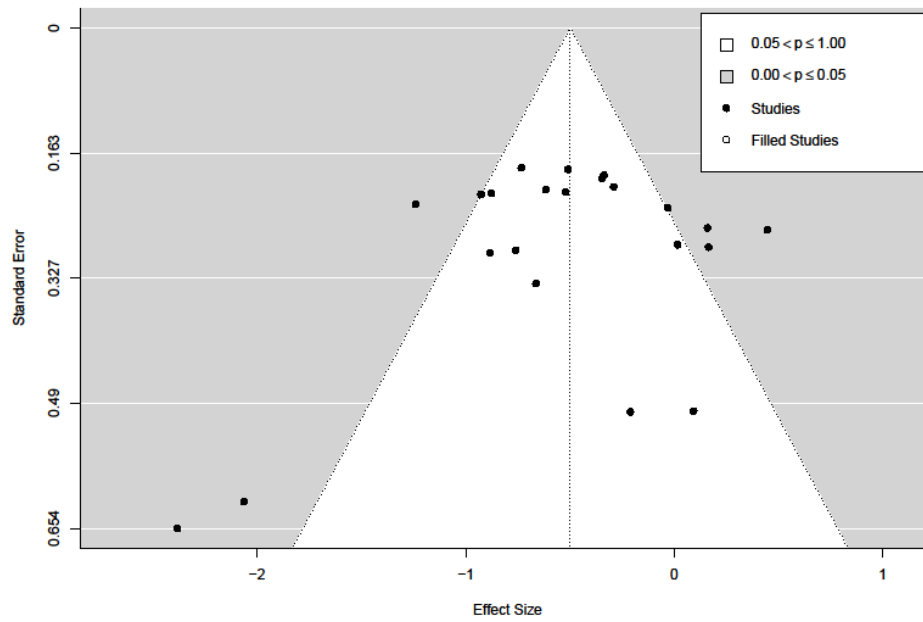

**Figure S5.** Funnel Plot of anxiety

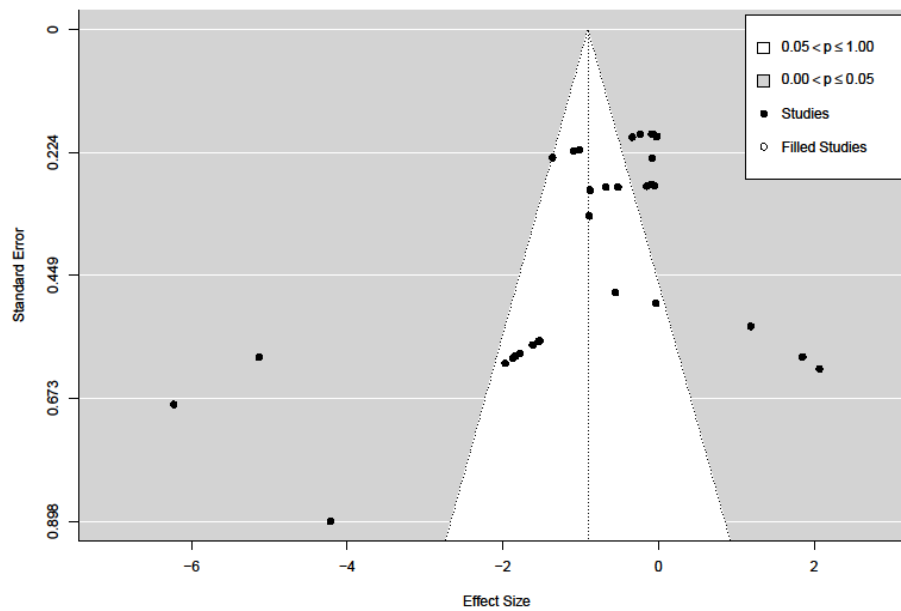

**Figure S6.** Funnel Plot of perceived stress

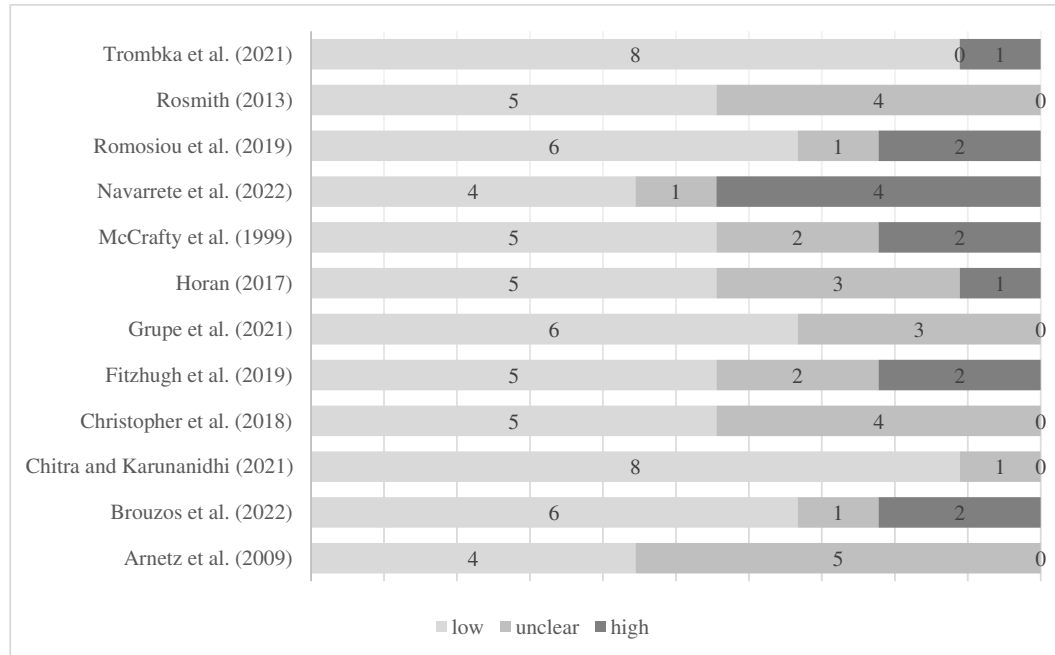

**Figure S7.** Rating of studies included in the meta-analysis on the 9 EPOC risk of bias criteria
